# Supplementary material for: An alanine expanded PABPN1 causes increased utilization of intronic polyadenylation sites
Source: PubMed Central journal article supplement — NPJ Aging Mech Dis. 2017 Apr 7;3:6. doi: 10.1038/s41514-017-0007-x (PMC5445584; doi:10.1038/s41514-017-0007-x), 2017-04-07
Supplement: 41514_2017_7_MOESM2_ESM.pdf [file 41514_2017_7_MOESM2_ESM.pdf]

Table S2

| <b>Gene</b>        | <b>strand</b> | <b>Switch direction</b> | <b>PAS switch</b>                    |
|--------------------|---------------|-------------------------|--------------------------------------|
| ENSMUSG00000000305 | +             | Upstream switch         | Distal-3UTR to Intron                |
| ENSMUSG00000000308 | +             | Downstream switch       | Alternative-3UTR to Distal-3UTR      |
| ENSMUSG00000000340 | +             | Upstream switch         | Distal-3UTR to Intron                |
| ENSMUSG00000000378 | +             | Upstream switch         | Distal-3UTR to Intron                |
| ENSMUSG00000000420 | +             | Upstream switch         | Distal-3UTR to Intron                |
| ENSMUSG00000000441 | -             | Upstream switch         | Exon to Intron                       |
| ENSMUSG00000000486 | -             | Upstream switch         | Distal-3UTR to Exon                  |
| ENSMUSG00000001127 | +             | Downstream switch       | Alternative-3UTR to Distal-3UTR      |
| ENSMUSG00000001323 | -             | Upstream switch         | Distal-3UTR to Intron                |
| ENSMUSG00000001420 | -             | Upstream switch         | Distal-3UTR to Intron                |
| ENSMUSG00000001542 | +             | Downstream switch       | Intron to Distal-3UTR                |
| ENSMUSG00000001870 | +             | Upstream switch         | Intron to Intron                     |
| ENSMUSG00000001983 | +             | Upstream switch         | Distal-3UTR to Intron                |
| ENSMUSG00000002043 | +             | Upstream switch         | Distal-3UTR to Intron                |
| ENSMUSG00000002107 | -             | Upstream switch         | Distal-3UTR to Intron                |
| ENSMUSG00000002345 | +             | Upstream switch         | Alternative-3UTR to Alternative-3UTR |
| ENSMUSG00000002346 | -             | Upstream switch         | Distal-3UTR to Exon                  |
| ENSMUSG00000002781 | +             | Upstream switch         | Distal-3UTR to Intron                |
| ENSMUSG00000002831 | -             | Upstream switch         | Distal-3UTR to Intron                |
| ENSMUSG00000003134 | -             | Downstream switch       | Alternative-3UTR to Distal-3UTR      |
| ENSMUSG00000003813 | -             | Upstream switch         | Alternative-3UTR to Intron           |
| ENSMUSG00000003955 | -             | Upstream switch         | Distal-3UTR to Intron                |
| ENSMUSG00000004071 | -             | Upstream switch         | Intron to Alternative-3UTR           |
| ENSMUSG00000004360 | +             | Upstream switch         | Distal-3UTR to Intron                |
| ENSMUSG00000005583 | +             | Upstream switch         | Distal-3UTR to Exon                  |
| ENSMUSG00000005667 | -             | Upstream switch         | Distal-3UTR to Intron                |
| ENSMUSG00000006050 | -             | Downstream switch       | Alternative-3UTR to Distal-3UTR      |
| ENSMUSG00000006435 | +             | Downstream switch       | Intron to Distal-3UTR                |
| ENSMUSG00000006462 | +             | Upstream switch         | Exon to Intron                       |
| ENSMUSG00000006699 | -             | Downstream switch       | Alternative-3UTR to Distal-3UTR      |
| ENSMUSG00000006705 | +             | Upstream switch         | Distal-3UTR to Intron                |
| ENSMUSG00000007097 | -             | Upstream switch         | Distal-3UTR to Intron                |
| ENSMUSG00000007617 | +             | Downstream switch       | Alternative-3UTR to Distal-3UTR      |
| ENSMUSG00000007812 | +             | Downstream switch       | Alternative-3UTR to Distal-3UTR      |
| ENSMUSG00000007950 | -             | Upstream switch         | Distal-3UTR to Intron                |
| ENSMUSG00000008373 | +             | Upstream switch         | Distal-3UTR to Exon                  |
| ENSMUSG00000008658 | +             | Upstream switch         | Distal-3UTR to Intron                |
| ENSMUSG00000009927 | +             | Upstream switch         | Distal-3UTR to Alternative-3UTR      |
| ENSMUSG00000010492 | +             | Downstream switch       | Exon to Exon                         |
| ENSMUSG00000011179 | +             | Upstream switch         | Distal-3UTR to Intron                |
| ENSMUSG00000011831 | -             | Upstream switch         | Distal-3UTR to Intron                |
| ENSMUSG00000012117 | -             | Upstream switch         | Distal-3UTR to Intron                |
| ENSMUSG00000012422 | +             | Upstream switch         | Alternative-3UTR to Intron           |
| ENSMUSG00000012443 | +             | Upstream switch         | Intron to Intron                     |
| ENSMUSG00000012609 | +             | Downstream switch       | Alternative-3UTR to Intron           |
| ENSMUSG00000013495 | +             | Upstream switch         | Distal-3UTR to Intron                |
| ENSMUSG00000014418 | -             | Upstream switch         | Distal-3UTR to Intron                |
| ENSMUSG00000014496 | -             | Downstream switch       | Intron to Distal-3UTR                |
| ENSMUSG00000014498 | +             | Upstream switch         | Intron to Alternative-3UTR           |
| ENSMUSG00000014763 | +             | Downstream switch       | Intron to Distal-3UTR                |
| ENSMUSG00000015488 | +             | Upstream switch         | Distal-3UTR to Alternative-3UTR      |

Table S2

|                    |   |                   |                                      |
|--------------------|---|-------------------|--------------------------------------|
| ENSMUSG00000015568 | + | Downstream switch | Intron to Alternative-3UTR           |
| ENSMUSG00000015597 | + | Downstream switch | Alternative-3UTR to Distal-3UTR      |
| ENSMUSG00000015711 | - | Downstream switch | Intron to Distal-3UTR                |
| ENSMUSG00000016327 | + | Upstream switch   | Distal-3UTR to Intron                |
| ENSMUSG00000016534 | - | Upstream switch   | Alternative-3UTR to Alternative-3UTR |
| ENSMUSG00000017421 | + | Downstream switch | Alternative-3UTR to Distal-3UTR      |
| ENSMUSG00000017781 | + | Downstream switch | Intron to Distal-3UTR                |
| ENSMUSG00000017837 | + | Upstream switch   | Distal-3UTR to Intron                |
| ENSMUSG00000018171 | - | Downstream switch | Intron to Distal-3UTR                |
| ENSMUSG00000018189 | + | Upstream switch   | Distal-3UTR to Intron                |
| ENSMUSG00000018377 | + | Upstream switch   | Distal-3UTR to Intron                |
| ENSMUSG00000018666 | + | Downstream switch | Alternative-3UTR to Distal-3UTR      |
| ENSMUSG00000019179 | + | Upstream switch   | Distal-3UTR to Exon                  |
| ENSMUSG00000019188 | + | Upstream switch   | Distal-3UTR to Intron                |
| ENSMUSG00000019699 | - | Upstream switch   | Distal-3UTR to Alternative-3UTR      |
| ENSMUSG00000019732 | - | Downstream switch | Intron to Distal-3UTR                |
| ENSMUSG00000019738 | + | Upstream switch   | Distal-3UTR to Exon                  |
| ENSMUSG00000019787 | + | Upstream switch   | Distal-3UTR to Intron                |
| ENSMUSG00000019795 | - | Upstream switch   | Distal-3UTR to Alternative-3UTR      |
| ENSMUSG00000019838 | - | Downstream switch | Intron to Distal-3UTR                |
| ENSMUSG00000019878 | + | Downstream switch | Intron to Distal-3UTR                |
| ENSMUSG00000019883 | + | Upstream switch   | Distal-3UTR to Intron                |
| ENSMUSG00000019923 | + | Upstream switch   | Distal-3UTR to Alternative-3UTR      |
| ENSMUSG00000020019 | + | Upstream switch   | Distal-3UTR to Intron                |
| ENSMUSG00000020023 | + | Upstream switch   | Distal-3UTR to Intron                |
| ENSMUSG00000020059 | + | Downstream switch | Intron to Distal-3UTR                |
| ENSMUSG00000020061 | - | Upstream switch   | Distal-3UTR to Alternative-3UTR      |
| ENSMUSG00000020288 | - | Upstream switch   | Distal-3UTR to Exon                  |
| ENSMUSG00000020326 | - | Upstream switch   | Distal-3UTR to Exon                  |
| ENSMUSG00000020333 | + | Downstream switch | Exon to Distal-3UTR                  |
| ENSMUSG00000020359 | + | Upstream switch   | Distal-3UTR to Alternative-3UTR      |
| ENSMUSG00000020389 | + | Upstream switch   | Distal-3UTR to Intron                |
| ENSMUSG00000020413 | - | Downstream switch | Intron to Distal-3UTR                |
| ENSMUSG00000020420 | + | Downstream switch | Intron to Exon                       |
| ENSMUSG00000020430 | + | Downstream switch | Intron to Distal-3UTR                |
| ENSMUSG00000020439 | - | Downstream switch | Alternative-3UTR to Distal-3UTR      |
| ENSMUSG00000020458 | + | Upstream switch   | Distal-3UTR to Exon                  |
| ENSMUSG00000020564 | + | Downstream switch | Alternative-3UTR to Distal-3UTR      |
| ENSMUSG00000020570 | + | Upstream switch   | Distal-3UTR to Intron                |
| ENSMUSG00000020623 | + | Upstream switch   | Intron to Alternative-3UTR           |
| ENSMUSG00000020634 | - | Downstream switch | Intron to Distal-3UTR                |
| ENSMUSG00000020696 | - | Upstream switch   | Distal-3UTR to Intron                |
| ENSMUSG00000020832 | - | Upstream switch   | Distal-3UTR to Intron                |
| ENSMUSG00000020900 | + | Downstream switch | Intron to Distal-3UTR                |
| ENSMUSG00000020935 | - | Upstream switch   | Distal-3UTR to Intron                |
| ENSMUSG00000020955 | + | Upstream switch   | Distal-3UTR to Intron                |
| ENSMUSG00000020956 | - | Upstream switch   | Distal-3UTR to Alternative-3UTR      |
| ENSMUSG00000021027 | - | Downstream switch | Intron to Distal-3UTR                |
| ENSMUSG00000021038 | - | Upstream switch   | Distal-3UTR to Intron                |
| ENSMUSG00000021178 | + | Upstream switch   | Distal-3UTR to Exon                  |
| ENSMUSG00000021271 | + | Downstream switch | Intron to Distal-3UTR                |
| ENSMUSG00000021288 | + | Downstream switch | Alternative-3UTR to Alternative-3UTR |
| ENSMUSG00000021458 | + | Upstream switch   | Intron to Alternative-3UTR           |

Table S2

|                    |   |                   |                                 |
|--------------------|---|-------------------|---------------------------------|
| ENSMUSG00000021488 | + | Downstream switch | Intron to Distal-3UTR           |
| ENSMUSG00000021519 | - | Upstream switch   | Intron to Alternative-3UTR      |
| ENSMUSG00000021536 | - | Upstream switch   | Distal-3UTR to Intron           |
| ENSMUSG00000021589 | - | Downstream switch | Alternative-3UTR to Distal-3UTR |
| ENSMUSG00000021622 | - | Upstream switch   | Distal-3UTR to Intron           |
| ENSMUSG00000021699 | + | Upstream switch   | Intron to Intron                |
| ENSMUSG00000021728 | + | Downstream switch | Intron to Distal-3UTR           |
| ENSMUSG00000021779 | + | Upstream switch   | Distal-3UTR to Intron           |
| ENSMUSG00000021816 | - | Upstream switch   | Distal-3UTR to Alternative-3UTR |
| ENSMUSG00000021843 | + | Upstream switch   | Distal-3UTR to Exon             |
| ENSMUSG00000021910 | - | Upstream switch   | Distal-3UTR to Intron           |
| ENSMUSG00000021973 | - | Upstream switch   | Distal-3UTR to Intron           |
| ENSMUSG00000021982 | - | Upstream switch   | Intron to Alternative-3UTR      |
| ENSMUSG00000022019 | + | Upstream switch   | Alternative-3UTR to Intron      |
| ENSMUSG00000022043 | + | Upstream switch   | Distal-3UTR to Intron           |
| ENSMUSG00000022110 | + | Upstream switch   | Distal-3UTR to Intron           |
| ENSMUSG00000022200 | + | Downstream switch | Intron to Distal-3UTR           |
| ENSMUSG00000022201 | + | Downstream switch | Intron to Distal-3UTR           |
| ENSMUSG00000022292 | - | Upstream switch   | Distal-3UTR to Intron           |
| ENSMUSG00000022389 | + | Downstream switch | Exon to Distal-3UTR             |
| ENSMUSG00000022415 | + | Downstream switch | Intron to Distal-3UTR           |
| ENSMUSG00000022441 | - | Upstream switch   | Distal-3UTR to Intron           |
| ENSMUSG00000022477 | + | Upstream switch   | Distal-3UTR to Intron           |
| ENSMUSG00000022510 | + | Downstream switch | Intron to Alternative-3UTR      |
| ENSMUSG00000022629 | - | Downstream switch | Intron to Distal-3UTR           |
| ENSMUSG00000022668 | - | Upstream switch   | Distal-3UTR to Intron           |
| ENSMUSG00000022674 | - | Upstream switch   | Distal-3UTR to Intron           |
| ENSMUSG00000022707 | + | Upstream switch   | Distal-3UTR to Intron           |
| ENSMUSG00000022771 | - | Upstream switch   | Distal-3UTR to Alternative-3UTR |
| ENSMUSG00000022867 | + | Upstream switch   | Distal-3UTR to Intron           |
| ENSMUSG00000022887 | - | Upstream switch   | Intron to Intron                |
| ENSMUSG00000022962 | - | Downstream switch | Alternative-3UTR to Distal-3UTR |
| ENSMUSG00000023025 | + | Downstream switch | Intron to Distal-3UTR           |
| ENSMUSG00000023068 | + | Downstream switch | Intron to Distal-3UTR           |
| ENSMUSG00000023307 | + | Upstream switch   | Distal-3UTR to Alternative-3UTR |
| ENSMUSG00000023845 | - | Downstream switch | Intron to Distal-3UTR           |
| ENSMUSG00000023959 | + | Downstream switch | Exon to Distal-3UTR             |
| ENSMUSG00000024038 | + | Downstream switch | Exon to Distal-3UTR             |
| ENSMUSG00000024145 | - | Downstream switch | Intron to Distal-3UTR           |
| ENSMUSG00000024188 | + | Downstream switch | Intron to Alternative-3UTR      |
| ENSMUSG00000024222 | - | Downstream switch | Intron to Distal-3UTR           |
| ENSMUSG00000024251 | - | Upstream switch   | Distal-3UTR to Intron           |
| ENSMUSG00000024302 | + | Downstream switch | Alternative-3UTR to Distal-3UTR |
| ENSMUSG00000024353 | - | Downstream switch | Intron to Distal-3UTR           |
| ENSMUSG00000024424 | + | Downstream switch | Intron to Distal-3UTR           |
| ENSMUSG00000024500 | - | Downstream switch | Intron to Intron                |
| ENSMUSG00000024507 | + | Upstream switch   | Distal-3UTR to Intron           |
| ENSMUSG00000024576 | + | Downstream switch | Alternative-3UTR to Distal-3UTR |
| ENSMUSG00000024583 | - | Upstream switch   | Distal-3UTR to Intron           |
| ENSMUSG00000024603 | + | Upstream switch   | Distal-3UTR to Intron           |
| ENSMUSG00000024640 | - | Downstream switch | Intron to Distal-3UTR           |
| ENSMUSG00000024654 | - | Upstream switch   | Distal-3UTR to Intron           |
| ENSMUSG00000024695 | - | Upstream switch   | Intron to Alternative-3UTR      |

Table S2

|                    |   |                   |                                 |
|--------------------|---|-------------------|---------------------------------|
| ENSMUSG00000024782 | - | Upstream switch   | Distal-3UTR to Intron           |
| ENSMUSG00000024924 | + | Upstream switch   | Distal-3UTR to Alternative-3UTR |
| ENSMUSG00000024998 | + | Downstream switch | Intron to Distal-3UTR           |
| ENSMUSG00000025049 | + | Downstream switch | Intron to Distal-3UTR           |
| ENSMUSG00000025227 | + | Upstream switch   | Distal-3UTR to Intron           |
| ENSMUSG00000025229 | - | Upstream switch   | Distal-3UTR to Intron           |
| ENSMUSG00000025234 | - | Downstream switch | Intron to Distal-3UTR           |
| ENSMUSG00000025283 | - | Downstream switch | Exon to Distal-3UTR             |
| ENSMUSG00000025326 | + | Upstream switch   | Distal-3UTR to Intron           |
| ENSMUSG00000025421 | + | Upstream switch   | Distal-3UTR to Intron           |
| ENSMUSG00000025423 | + | Upstream switch   | Distal-3UTR to Alternative-3UTR |
| ENSMUSG00000025555 | + | Upstream switch   | Distal-3UTR to Intron           |
| ENSMUSG00000025607 | - | Downstream switch | Intron to Distal-3UTR           |
| ENSMUSG00000025609 | + | Downstream switch | Intron to Distal-3UTR           |
| ENSMUSG00000025762 | + | Upstream switch   | Intron to Alternative-3UTR      |
| ENSMUSG00000025781 | - | Downstream switch | Intron to Distal-3UTR           |
| ENSMUSG00000025786 | - | Downstream switch | Alternative-3UTR to Distal-3UTR |
| ENSMUSG00000025790 | - | Upstream switch   | Distal-3UTR to Alternative-3UTR |
| ENSMUSG00000025812 | + | Downstream switch | Alternative-3UTR to Distal-3UTR |
| ENSMUSG00000025855 | - | Upstream switch   | Distal-3UTR to Intron           |
| ENSMUSG00000025862 | + | Downstream switch | Exon to Distal-3UTR             |
| ENSMUSG00000025893 | + | Upstream switch   | Distal-3UTR to Exon             |
| ENSMUSG00000025917 | - | Upstream switch   | Distal-3UTR to Intron           |
| ENSMUSG00000026000 | - | Downstream switch | Intron to Distal-3UTR           |
| ENSMUSG00000026012 | + | Upstream switch   | Distal-3UTR to Intron           |
| ENSMUSG00000026031 | + | Upstream switch   | Distal-3UTR to Exon             |
| ENSMUSG00000026032 | + | Upstream switch   | Distal-3UTR to Intron           |
| ENSMUSG00000026096 | + | Upstream switch   | Distal-3UTR to Alternative-3UTR |
| ENSMUSG00000026150 | + | Upstream switch   | Distal-3UTR to Exon             |
| ENSMUSG00000026245 | - | Downstream switch | Alternative-3UTR to Distal-3UTR |
| ENSMUSG00000026259 | - | Downstream switch | Intron to Distal-3UTR           |
| ENSMUSG00000026309 | - | Upstream switch   | Distal-3UTR to Alternative-3UTR |
| ENSMUSG00000026399 | - | Upstream switch   | Distal-3UTR to Alternative-3UTR |
| ENSMUSG00000026427 | + | Upstream switch   | Alternative-3UTR to Exon        |
| ENSMUSG00000026436 | + | Upstream switch   | Distal-3UTR to Alternative-3UTR |
| ENSMUSG00000026470 | + | Upstream switch   | Alternative-3UTR to Exon        |
| ENSMUSG00000026504 | + | Upstream switch   | Distal-3UTR to Intron           |
| ENSMUSG00000026568 | + | Upstream switch   | Distal-3UTR to Exon             |
| ENSMUSG00000026571 | - | Upstream switch   | Distal-3UTR to Intron           |
| ENSMUSG00000026604 | + | Downstream switch | Intron to Distal-3UTR           |
| ENSMUSG00000026626 | - | Upstream switch   | Distal-3UTR to Exon             |
| ENSMUSG00000026696 | + | Upstream switch   | Distal-3UTR to Alternative-3UTR |
| ENSMUSG00000026730 | + | Upstream switch   | Distal-3UTR to Intron           |
| ENSMUSG00000026740 | - | Upstream switch   | Alternative-3UTR to Intron      |
| ENSMUSG00000026743 | + | Upstream switch   | Distal-3UTR to Intron           |
| ENSMUSG00000026833 | + | Upstream switch   | Distal-3UTR to Alternative-3UTR |
| ENSMUSG00000026853 | - | Upstream switch   | Distal-3UTR to Intron           |
| ENSMUSG00000026854 | + | Upstream switch   | Distal-3UTR to Intron           |
| ENSMUSG00000026864 | + | Downstream switch | Exon to Distal-3UTR             |
| ENSMUSG00000026888 | - | Upstream switch   | Distal-3UTR to Intron           |
| ENSMUSG00000026904 | + | Downstream switch | Intron to Distal-3UTR           |
| ENSMUSG00000027176 | + | Upstream switch   | Distal-3UTR to Exon             |
| ENSMUSG00000027274 | - | Downstream switch | Exon to Distal-3UTR             |

Table S2

|                    |   |                   |                                      |
|--------------------|---|-------------------|--------------------------------------|
| ENSMUSG00000027309 | - | Upstream switch   | Intron to Intron                     |
| ENSMUSG00000027361 | - | Upstream switch   | Distal-3UTR to Intron                |
| ENSMUSG00000027367 | + | Upstream switch   | Distal-3UTR to Alternative-3UTR      |
| ENSMUSG00000027387 | - | Upstream switch   | Distal-3UTR to Intron                |
| ENSMUSG00000027536 | + | Upstream switch   | Intron to Alternative-3UTR           |
| ENSMUSG00000027805 | - | Upstream switch   | Distal-3UTR to Alternative-3UTR      |
| ENSMUSG00000027887 | - | Upstream switch   | Distal-3UTR to Intron                |
| ENSMUSG00000027895 | - | Upstream switch   | Distal-3UTR to Intron                |
| ENSMUSG00000027940 | + | Downstream switch | Alternative-3UTR to Distal-3UTR      |
| ENSMUSG00000027961 | + | Upstream switch   | Distal-3UTR to Exon                  |
| ENSMUSG00000028035 | - | Upstream switch   | Intron to Exon                       |
| ENSMUSG00000028042 | - | Upstream switch   | Distal-3UTR to Intron                |
| ENSMUSG00000028062 | - | Upstream switch   | Distal-3UTR to Intron                |
| ENSMUSG00000028063 | - | Upstream switch   | Distal-3UTR to Alternative-3UTR      |
| ENSMUSG00000028106 | - | Downstream switch | Alternative-3UTR to Distal-3UTR      |
| ENSMUSG00000028149 | - | Upstream switch   | Distal-3UTR to Intron                |
| ENSMUSG00000028161 | + | Upstream switch   | Distal-3UTR to Intron                |
| ENSMUSG00000028165 | - | Upstream switch   | Distal-3UTR to Exon                  |
| ENSMUSG00000028188 | - | Upstream switch   | Distal-3UTR to Intron                |
| ENSMUSG00000028207 | - | Upstream switch   | Intron to Alternative-3UTR           |
| ENSMUSG00000028229 | + | Upstream switch   | Distal-3UTR to Intron                |
| ENSMUSG00000028273 | - | Upstream switch   | Intron to Alternative-3UTR           |
| ENSMUSG00000028293 | - | Upstream switch   | Distal-3UTR to Intron                |
| ENSMUSG00000028396 | - | Downstream switch | Alternative-3UTR to Distal-3UTR      |
| ENSMUSG00000028398 | - | Upstream switch   | Distal-3UTR to Intron                |
| ENSMUSG00000028423 | + | Downstream switch | Alternative-3UTR to Distal-3UTR      |
| ENSMUSG00000028676 | + | Upstream switch   | Distal-3UTR to Alternative-3UTR      |
| ENSMUSG00000028710 | + | Upstream switch   | Alternative-3UTR to Alternative-3UTR |
| ENSMUSG00000028756 | - | Upstream switch   | Distal-3UTR to Intron                |
| ENSMUSG00000028901 | - | Upstream switch   | Intron to Intron                     |
| ENSMUSG00000028962 | + | Upstream switch   | Distal-3UTR to Intron                |
| ENSMUSG00000028999 | + | Upstream switch   | Distal-3UTR to Alternative-3UTR      |
| ENSMUSG00000029136 | - | Upstream switch   | Distal-3UTR to Intron                |
| ENSMUSG00000029152 | + | Upstream switch   | Distal-3UTR to Alternative-3UTR      |
| ENSMUSG00000029153 | - | Upstream switch   | Distal-3UTR to Exon                  |
| ENSMUSG00000029156 | - | Upstream switch   | Distal-3UTR to Intron                |
| ENSMUSG00000029178 | + | Upstream switch   | Distal-3UTR to Intron                |
| ENSMUSG00000029189 | - | Downstream switch | Intron to Distal-3UTR                |
| ENSMUSG00000029227 | + | Upstream switch   | Distal-3UTR to Exon                  |
| ENSMUSG00000029238 | - | Upstream switch   | Distal-3UTR to Intron                |
| ENSMUSG00000029270 | - | Upstream switch   | Distal-3UTR to Exon                  |
| ENSMUSG00000029309 | - | Downstream switch | Intron to Distal-3UTR                |
| ENSMUSG00000029376 | + | Upstream switch   | Distal-3UTR to Alternative-3UTR      |
| ENSMUSG00000029432 | + | Upstream switch   | Distal-3UTR to Intron                |
| ENSMUSG00000029499 | - | Upstream switch   | Distal-3UTR to Intron                |
| ENSMUSG00000029610 | - | Upstream switch   | Distal-3UTR to Intron                |
| ENSMUSG00000029669 | - | Downstream switch | Intron to Distal-3UTR                |
| ENSMUSG00000029705 | - | Upstream switch   | Distal-3UTR to Alternative-3UTR      |
| ENSMUSG00000029723 | + | Downstream switch | Alternative-3UTR to Distal-3UTR      |
| ENSMUSG00000029759 | - | Downstream switch | Intron to Distal-3UTR                |
| ENSMUSG00000029763 | + | Upstream switch   | Distal-3UTR to Intron                |
| ENSMUSG00000029821 | - | Upstream switch   | Intron to Alternative-3UTR           |
| ENSMUSG00000029862 | + | Upstream switch   | Exon to Intron                       |

Table S2

|                    |   |                   |                                 |
|--------------------|---|-------------------|---------------------------------|
| ENSMUSG00000030047 | - | Downstream switch | Intron to Distal-3UTR           |
| ENSMUSG00000030102 | + | Upstream switch   | Distal-3UTR to Intron           |
| ENSMUSG00000030201 | - | Downstream switch | Exon to Distal-3UTR             |
| ENSMUSG00000030264 | + | Downstream switch | Exon to Distal-3UTR             |
| ENSMUSG00000030306 | - | Upstream switch   | Distal-3UTR to Intron           |
| ENSMUSG00000030386 | + | Upstream switch   | Distal-3UTR to Exon             |
| ENSMUSG00000030447 | + | Downstream switch | Intron to Distal-3UTR           |
| ENSMUSG00000030451 | + | Downstream switch | Intron to Distal-3UTR           |
| ENSMUSG00000030602 | - | Upstream switch   | Intron to Alternative-3UTR      |
| ENSMUSG00000030610 | - | Downstream switch | Alternative-3UTR to Distal-3UTR |
| ENSMUSG00000030729 | + | Upstream switch   | Intron to Alternative-3UTR      |
| ENSMUSG00000030779 | + | Downstream switch | Exon to Alternative-3UTR        |
| ENSMUSG00000030801 | + | Upstream switch   | Distal-3UTR to Intron           |
| ENSMUSG00000030990 | + | Upstream switch   | Distal-3UTR to Intron           |
| ENSMUSG00000031027 | - | Downstream switch | Intron to Distal-3UTR           |
| ENSMUSG00000031198 | + | Upstream switch   | Distal-3UTR to Exon             |
| ENSMUSG00000031221 | + | Downstream switch | Intron to Distal-3UTR           |
| ENSMUSG00000031229 | - | Upstream switch   | Distal-3UTR to Alternative-3UTR |
| ENSMUSG00000031333 | - | Upstream switch   | Distal-3UTR to Intron           |
| ENSMUSG00000031367 | + | Upstream switch   | Distal-3UTR to Intron           |
| ENSMUSG00000031380 | + | Upstream switch   | Distal-3UTR to Intron           |
| ENSMUSG00000031382 | + | Upstream switch   | Distal-3UTR to Intron           |
| ENSMUSG00000031453 | - | Upstream switch   | Distal-3UTR to Intron           |
| ENSMUSG00000031461 | + | Upstream switch   | Distal-3UTR to Exon             |
| ENSMUSG00000031508 | - | Upstream switch   | Distal-3UTR to Alternative-3UTR |
| ENSMUSG00000031516 | - | Upstream switch   | Distal-3UTR to Intron           |
| ENSMUSG00000031536 | - | Upstream switch   | Distal-3UTR to Intron           |
| ENSMUSG00000031592 | + | Upstream switch   | Distal-3UTR to Intron           |
| ENSMUSG00000031660 | - | Upstream switch   | Distal-3UTR to Exon             |
| ENSMUSG00000031791 | + | Upstream switch   | Distal-3UTR to Intron           |
| ENSMUSG00000031885 | + | Upstream switch   | Distal-3UTR to Intron           |
| ENSMUSG00000031938 | - | Upstream switch   | Distal-3UTR to Exon             |
| ENSMUSG00000032042 | + | Upstream switch   | Intron to Intron                |
| ENSMUSG00000032067 | - | Upstream switch   | Distal-3UTR to Intron           |
| ENSMUSG00000032185 | + | Upstream switch   | Distal-3UTR to Intron           |
| ENSMUSG00000032314 | - | Upstream switch   | Distal-3UTR to Intron           |
| ENSMUSG00000032336 | + | Upstream switch   | Alternative-3UTR to Intron      |
| ENSMUSG00000032380 | + | Upstream switch   | Distal-3UTR to Intron           |
| ENSMUSG00000032403 | - | Upstream switch   | Distal-3UTR to Intron           |
| ENSMUSG00000032423 | - | Downstream switch | Alternative-3UTR to Distal-3UTR |
| ENSMUSG00000032479 | + | Upstream switch   | Distal-3UTR to Intron           |
| ENSMUSG00000032481 | + | Downstream switch | Alternative-3UTR to Distal-3UTR |
| ENSMUSG00000032563 | + | Downstream switch | Intron to Distal-3UTR           |
| ENSMUSG00000032743 | + | Upstream switch   | Distal-3UTR to Exon             |
| ENSMUSG00000032816 | + | Downstream switch | Intron to Distal-3UTR           |
| ENSMUSG00000032913 | - | Upstream switch   | Alternative-3UTR to Intron      |
| ENSMUSG00000032942 | + | Upstream switch   | Distal-3UTR to Exon             |
| ENSMUSG00000033278 | - | Downstream switch | Intron to Distal-3UTR           |
| ENSMUSG00000033306 | + | Upstream switch   | Distal-3UTR to Intron           |
| ENSMUSG00000033352 | - | Downstream switch | Intron to Distal-3UTR           |
| ENSMUSG00000033400 | - | Upstream switch   | Distal-3UTR to Alternative-3UTR |
| ENSMUSG00000033713 | - | Upstream switch   | Distal-3UTR to Intron           |
| ENSMUSG00000033773 | + | Upstream switch   | Distal-3UTR to Intron           |

Table S2

|                    |   |                   |                                 |
|--------------------|---|-------------------|---------------------------------|
| ENSMUSG00000033972 | - | Upstream switch   | Distal-3UTR to Exon             |
| ENSMUSG00000034055 | - | Upstream switch   | Distal-3UTR to Intron           |
| ENSMUSG00000034066 | + | Upstream switch   | Intron to Alternative-3UTR      |
| ENSMUSG00000034210 | + | Upstream switch   | Distal-3UTR to Alternative-3UTR |
| ENSMUSG00000034297 | - | Downstream switch | Intron to Distal-3UTR           |
| ENSMUSG00000034377 | + | Upstream switch   | Distal-3UTR to Intron           |
| ENSMUSG00000034566 | - | Upstream switch   | Distal-3UTR to Exon             |
| ENSMUSG00000034602 | - | Downstream switch | Intron to Distal-3UTR           |
| ENSMUSG00000034667 | - | Upstream switch   | Distal-3UTR to Intron           |
| ENSMUSG00000034751 | - | Upstream switch   | Intron to Intron                |
| ENSMUSG00000034820 | + | Upstream switch   | Distal-3UTR to Intron           |
| ENSMUSG00000034898 | - | Downstream switch | Intron to Distal-3UTR           |
| ENSMUSG00000035284 | + | Downstream switch | Intron to Distal-3UTR           |
| ENSMUSG00000035295 | + | Downstream switch | Alternative-3UTR to Distal-3UTR |
| ENSMUSG00000035606 | + | Upstream switch   | Distal-3UTR to Intron           |
| ENSMUSG00000035629 | - | Upstream switch   | Distal-3UTR to Exon             |
| ENSMUSG00000035642 | - | Upstream switch   | Intron to Exon                  |
| ENSMUSG00000035934 | - | Upstream switch   | Distal-3UTR to Intron           |
| ENSMUSG00000035949 | - | Downstream switch | Intron to Distal-3UTR           |
| ENSMUSG00000036120 | - | Upstream switch   | Distal-3UTR to Intron           |
| ENSMUSG00000036167 | + | Upstream switch   | Distal-3UTR to Intron           |
| ENSMUSG00000036339 | + | Upstream switch   | Distal-3UTR to Intron           |
| ENSMUSG00000036617 | + | Downstream switch | Intron to Distal-3UTR           |
| ENSMUSG00000037062 | - | Downstream switch | Alternative-3UTR to Distal-3UTR |
| ENSMUSG00000037514 | + | Downstream switch | Intron to Distal-3UTR           |
| ENSMUSG00000037773 | - | Upstream switch   | Distal-3UTR to Intron           |
| ENSMUSG00000037845 | + | Upstream switch   | Distal-3UTR to Exon             |
| ENSMUSG00000037857 | + | Upstream switch   | Intron to Alternative-3UTR      |
| ENSMUSG00000037957 | + | Upstream switch   | Distal-3UTR to Intron           |
| ENSMUSG00000038005 | + | Upstream switch   | Distal-3UTR to Intron           |
| ENSMUSG00000038170 | - | Downstream switch | Intron to Distal-3UTR           |
| ENSMUSG00000038181 | + | Downstream switch | Alternative-3UTR to Distal-3UTR |
| ENSMUSG00000038201 | + | Upstream switch   | Distal-3UTR to Exon             |
| ENSMUSG00000038217 | + | Downstream switch | Intron to Distal-3UTR           |
| ENSMUSG00000038344 | - | Upstream switch   | Distal-3UTR to Alternative-3UTR |
| ENSMUSG00000038506 | - | Upstream switch   | Distal-3UTR to Intron           |
| ENSMUSG00000038522 | - | Upstream switch   | Distal-3UTR to Intron           |
| ENSMUSG00000038563 | + | Downstream switch | Intron to Distal-3UTR           |
| ENSMUSG00000038582 | + | Upstream switch   | Distal-3UTR to Intron           |
| ENSMUSG00000038664 | + | Upstream switch   | Distal-3UTR to Exon             |
| ENSMUSG00000038668 | - | Downstream switch | Intron to Distal-3UTR           |
| ENSMUSG00000038733 | - | Downstream switch | Intron to Alternative-3UTR      |
| ENSMUSG00000038774 | + | Downstream switch | Intron to Distal-3UTR           |
| ENSMUSG00000038784 | - | Upstream switch   | Intron to Alternative-3UTR      |
| ENSMUSG00000039031 | + | Upstream switch   | Distal-3UTR to Intron           |
| ENSMUSG00000039100 | - | Upstream switch   | Distal-3UTR to Intron           |
| ENSMUSG00000039126 | + | Downstream switch | Intron to Distal-3UTR           |
| ENSMUSG00000039285 | + | Downstream switch | Intron to Alternative-3UTR      |
| ENSMUSG00000039384 | + | Upstream switch   | Distal-3UTR to Intron           |
| ENSMUSG00000039419 | + | Downstream switch | Intron to Distal-3UTR           |
| ENSMUSG00000039699 | + | Downstream switch | Intron to Distal-3UTR           |
| ENSMUSG00000039828 | - | Downstream switch | Intron to Distal-3UTR           |
| ENSMUSG00000039841 | - | Downstream switch | Intron to Distal-3UTR           |

Table S2

|                    |   |                   |                                      |
|--------------------|---|-------------------|--------------------------------------|
| ENSMUSG00000039914 | - | Upstream switch   | Distal-3UTR to Intron                |
| ENSMUSG00000040006 | - | Upstream switch   | Distal-3UTR to Intron                |
| ENSMUSG00000040118 | + | Upstream switch   | Distal-3UTR to Exon                  |
| ENSMUSG00000040195 | + | Upstream switch   | Distal-3UTR to Exon                  |
| ENSMUSG00000040270 | + | Upstream switch   | Intron to Intron                     |
| ENSMUSG00000040481 | - | Upstream switch   | Distal-3UTR to Exon                  |
| ENSMUSG00000040738 | - | Upstream switch   | Intron to Intron                     |
| ENSMUSG00000040740 | - | Upstream switch   | Distal-3UTR to Intron                |
| ENSMUSG00000040820 | - | Upstream switch   | Distal-3UTR to Intron                |
| ENSMUSG00000040850 | + | Downstream switch | Intron to Distal-3UTR                |
| ENSMUSG00000040875 | + | Downstream switch | Intron to Distal-3UTR                |
| ENSMUSG00000041115 | + | Downstream switch | Intron to Distal-3UTR                |
| ENSMUSG00000041328 | - | Upstream switch   | Intron to Intron                     |
| ENSMUSG00000041607 | + | Upstream switch   | Distal-3UTR to Alternative-3UTR      |
| ENSMUSG00000041658 | + | Upstream switch   | Distal-3UTR to Intron                |
| ENSMUSG00000041895 | - | Downstream switch | Alternative-3UTR to Distal-3UTR      |
| ENSMUSG00000042035 | + | Upstream switch   | Distal-3UTR to Intron                |
| ENSMUSG00000042198 | + | Upstream switch   | Alternative-3UTR to Intron           |
| ENSMUSG00000042225 | - | Upstream switch   | Distal-3UTR to Intron                |
| ENSMUSG00000042369 | + | Upstream switch   | Distal-3UTR to Intron                |
| ENSMUSG00000042444 | - | Downstream switch | Intron to Distal-3UTR                |
| ENSMUSG00000042508 | - | Upstream switch   | Distal-3UTR to Intron                |
| ENSMUSG00000042700 | + | Upstream switch   | Distal-3UTR to Intron                |
| ENSMUSG00000042851 | + | Upstream switch   | Distal-3UTR to Intron                |
| ENSMUSG00000043079 | - | Downstream switch | Alternative-3UTR to Distal-3UTR      |
| ENSMUSG00000043336 | + | Downstream switch | Intron to Distal-3UTR                |
| ENSMUSG00000043391 | - | Upstream switch   | Distal-3UTR to Intron                |
| ENSMUSG00000043639 | + | Downstream switch | Intron to Distal-3UTR                |
| ENSMUSG00000044042 | + | Downstream switch | Intron to Intron                     |
| ENSMUSG00000044148 | - | Downstream switch | Intron to Distal-3UTR                |
| ENSMUSG00000044934 | - | Downstream switch | Intron to Distal-3UTR                |
| ENSMUSG00000044938 | + | Upstream switch   | Distal-3UTR to Intron                |
| ENSMUSG00000045039 | + | Downstream switch | Intron to Distal-3UTR                |
| ENSMUSG00000045098 | + | Upstream switch   | Alternative-3UTR to Alternative-3UTR |
| ENSMUSG00000045102 | - | Upstream switch   | Exon to Intron                       |
| ENSMUSG00000045103 | + | Upstream switch   | Distal-3UTR to Intron                |
| ENSMUSG00000045410 | - | Upstream switch   | Distal-3UTR to Intron                |
| ENSMUSG00000045576 | + | Upstream switch   | Intron to Intron                     |
| ENSMUSG00000045624 | - | Upstream switch   | Distal-3UTR to Exon                  |
| ENSMUSG00000046110 | - | Downstream switch | Intron to Intron                     |
| ENSMUSG00000046311 | + | Upstream switch   | Distal-3UTR to Exon                  |
| ENSMUSG00000046314 | - | Upstream switch   | Distal-3UTR to Intron                |
| ENSMUSG00000046709 | - | Downstream switch | Intron to Distal-3UTR                |
| ENSMUSG00000046792 | - | Downstream switch | Intron to Distal-3UTR                |
| ENSMUSG00000047022 | + | Downstream switch | Intron to Distal-3UTR                |
| ENSMUSG00000047123 | - | Upstream switch   | Distal-3UTR to Intron                |
| ENSMUSG00000047126 | - | Upstream switch   | Distal-3UTR to Intron                |
| ENSMUSG00000047419 | - | Upstream switch   | Distal-3UTR to Intron                |
| ENSMUSG00000047466 | - | Downstream switch | Intron to Distal-3UTR                |
| ENSMUSG00000047996 | - | Downstream switch | Intron to Distal-3UTR                |
| ENSMUSG00000048271 | + | Upstream switch   | Alternative-3UTR to Intron           |
| ENSMUSG00000049680 | - | Upstream switch   | Distal-3UTR to Intron                |
| ENSMUSG00000049755 | - | Downstream switch | Exon to Distal-3UTR                  |



Table S2

|                    |   |                   |                                      |
|--------------------|---|-------------------|--------------------------------------|
| ENSMUSG00000050174 | - | Downstream switch | Intron to Intron                     |
| ENSMUSG00000050312 | - | Upstream switch   | Distal-3UTR to Intron                |
| ENSMUSG00000050323 | - | Upstream switch   | Distal-3UTR to Intron                |
| ENSMUSG00000050471 | - | Upstream switch   | Distal-3UTR to Intron                |
| ENSMUSG00000050891 | - | Upstream switch   | Intron to Intron                     |
| ENSMUSG00000051034 | - | Upstream switch   | Distal-3UTR to Intron                |
| ENSMUSG00000051747 | - | Upstream switch   | Distal-3UTR to Intron                |
| ENSMUSG00000051984 | - | Downstream switch | Intron to Distal-3UTR                |
| ENSMUSG00000052446 | + | Upstream switch   | Intron to Intron                     |
| ENSMUSG00000052459 | - | Downstream switch | Intron to Distal-3UTR                |
| ENSMUSG00000052572 | + | Downstream switch | Intron to Distal-3UTR                |
| ENSMUSG00000052675 | + | Upstream switch   | Distal-3UTR to Exon                  |
| ENSMUSG00000052915 | + | Downstream switch | Alternative-3UTR to Distal-3UTR      |
| ENSMUSG00000052926 | - | Upstream switch   | Distal-3UTR to Exon                  |
| ENSMUSG00000052949 | - | Upstream switch   | Distal-3UTR to Intron                |
| ENSMUSG00000053091 | + | Upstream switch   | Intron to Intron                     |
| ENSMUSG00000053347 | + | Upstream switch   | Alternative-3UTR to Alternative-3UTR |
| ENSMUSG00000053768 | - | Upstream switch   | Alternative-3UTR to Intron           |
| ENSMUSG00000053929 | - | Upstream switch   | Alternative-3UTR to Alternative-3UTR |
| ENSMUSG00000054206 | + | Downstream switch | Intron to Distal-3UTR                |
| ENSMUSG00000054752 | + | Downstream switch | Intron to Distal-3UTR                |
| ENSMUSG00000054766 | + | Downstream switch | Intron to Distal-3UTR                |
| ENSMUSG00000055027 | - | Upstream switch   | Distal-3UTR to Intron                |
| ENSMUSG00000055128 | + | Upstream switch   | Distal-3UTR to Exon                  |
| ENSMUSG00000055435 | - | Upstream switch   | Distal-3UTR to Alternative-3UTR      |
| ENSMUSG00000055489 | + | Downstream switch | Intron to Distal-3UTR                |
| ENSMUSG00000055980 | - | Upstream switch   | Distal-3UTR to Intron                |
| ENSMUSG00000056076 | + | Downstream switch | Intron to Distal-3UTR                |
| ENSMUSG00000056121 | - | Upstream switch   | Distal-3UTR to Intron                |
| ENSMUSG00000056459 | - | Upstream switch   | Distal-3UTR to Intron                |
| ENSMUSG00000056880 | + | Downstream switch | Intron to Distal-3UTR                |
| ENSMUSG00000056900 | + | Upstream switch   | Distal-3UTR to Intron                |
| ENSMUSG00000056973 | - | Downstream switch | Intron to Intron                     |
| ENSMUSG00000057103 | - | Upstream switch   | Distal-3UTR to Intron                |
| ENSMUSG00000058013 | + | Upstream switch   | Distal-3UTR to Alternative-3UTR      |
| ENSMUSG00000058076 | - | Upstream switch   | Distal-3UTR to Intron                |
| ENSMUSG00000058420 | - | Upstream switch   | Distal-3UTR to Alternative-3UTR      |
| ENSMUSG00000058589 | + | Upstream switch   | Intron to Intron                     |
| ENSMUSG00000058799 | + | Downstream switch | Intron to Distal-3UTR                |
| ENSMUSG00000058925 | + | Downstream switch | Intron to Distal-3UTR                |
| ENSMUSG00000058966 | + | Downstream switch | Intron to Distal-3UTR                |
| ENSMUSG00000058975 | + | Downstream switch | Alternative-3UTR to Distal-3UTR      |
| ENSMUSG00000059714 | + | Upstream switch   | Distal-3UTR to Intron                |
| ENSMUSG00000060002 | - | Upstream switch   | Intron to Alternative-3UTR           |
| ENSMUSG00000060152 | + | Downstream switch | Alternative-3UTR to Intron           |
| ENSMUSG00000060475 | - | Downstream switch | Alternative-3UTR to Distal-3UTR      |
| ENSMUSG00000060510 | - | Upstream switch   | Distal-3UTR to Exon                  |
| ENSMUSG00000060512 | + | Upstream switch   | Distal-3UTR to Intron                |
| ENSMUSG00000060579 | - | Downstream switch | Intron to Distal-3UTR                |
| ENSMUSG00000060679 | + | Upstream switch   | Distal-3UTR to Intron                |
| ENSMUSG00000060743 | - | Upstream switch   | Distal-3UTR to Intron                |
| ENSMUSG00000060843 | + | Downstream switch | Intron to Distal-3UTR                |
| ENSMUSG00000060923 | - | Upstream switch   | Distal-3UTR to Intron                |

Table S2

|                    |   |                   |                                      |
|--------------------|---|-------------------|--------------------------------------|
| ENSMUSG00000061130 | + | Upstream switch   | Alternative-3UTR to Alternative-3UTR |
| ENSMUSG00000061723 | + | Upstream switch   | Intron to Intron                     |
| ENSMUSG00000061816 | - | Upstream switch   | Distal-3UTR to Alternative-3UTR      |
| ENSMUSG00000062078 | - | Upstream switch   | Distal-3UTR to Alternative-3UTR      |
| ENSMUSG00000062797 | - | Upstream switch   | Distal-3UTR to Intron                |
| ENSMUSG00000062995 | - | Upstream switch   | Distal-3UTR to Intron                |
| ENSMUSG00000063077 | - | Downstream switch | Alternative-3UTR to Distal-3UTR      |
| ENSMUSG00000063142 | - | Downstream switch | Intron to Distal-3UTR                |
| ENSMUSG00000063564 | + | Downstream switch | Intron to Distal-3UTR                |
| ENSMUSG00000063972 | - | Downstream switch | Intron to Distal-3UTR                |
| ENSMUSG00000064061 | - | Downstream switch | Exon to Distal-3UTR                  |
| ENSMUSG00000064127 | - | Upstream switch   | Distal-3UTR to Alternative-3UTR      |
| ENSMUSG00000066151 | - | Upstream switch   | Distal-3UTR to Intron                |
| ENSMUSG00000066595 | - | Downstream switch | Alternative-3UTR to Distal-3UTR      |
| ENSMUSG00000066613 | + | Upstream switch   | Distal-3UTR to Alternative-3UTR      |
| ENSMUSG00000067653 | - | Upstream switch   | Distal-3UTR to Alternative-3UTR      |
| ENSMUSG00000067851 | - | Upstream switch   | Distal-3UTR to Intron                |
| ENSMUSG00000067942 | + | Upstream switch   | Distal-3UTR to Intron                |
| ENSMUSG00000068205 | + | Upstream switch   | Intron to Alternative-3UTR           |
| ENSMUSG00000068250 | - | Upstream switch   | Distal-3UTR to Exon                  |
| ENSMUSG00000068284 | + | Downstream switch | Intron to Distal-3UTR                |
| ENSMUSG00000068551 | - | Downstream switch | Alternative-3UTR to Distal-3UTR      |
| ENSMUSG00000068686 | + | Upstream switch   | Intron to Alternative-3UTR           |
| ENSMUSG00000068823 | + | Upstream switch   | Distal-3UTR to Exon                  |
| ENSMUSG00000069255 | + | Upstream switch   | Distal-3UTR to Intron                |
| ENSMUSG00000069769 | - | Downstream switch | Intron to Distal-3UTR                |
| ENSMUSG00000069808 | + | Upstream switch   | Distal-3UTR to Intron                |
| ENSMUSG00000070369 | + | Upstream switch   | Intron to Intron                     |
| ENSMUSG00000070385 | + | Upstream switch   | Distal-3UTR to Intron                |
| ENSMUSG00000070498 | + | Downstream switch | Intron to Distal-3UTR                |
| ENSMUSG00000070565 | - | Downstream switch | Intron to Distal-3UTR                |
| ENSMUSG00000070939 | - | Upstream switch   | Distal-3UTR to Intron                |
| ENSMUSG00000071042 | + | Upstream switch   | Distal-3UTR to Intron                |
| ENSMUSG00000071266 | + | Upstream switch   | Distal-3UTR to Exon                  |
| ENSMUSG00000071267 | - | Upstream switch   | Distal-3UTR to Exon                  |
| ENSMUSG00000071337 | + | Upstream switch   | Distal-3UTR to Intron                |
| ENSMUSG00000071793 | - | Upstream switch   | Intron to Exon                       |
| ENSMUSG00000071796 | - | Upstream switch   | Intron to Exon                       |
| ENSMUSG00000072946 | + | Upstream switch   | Distal-3UTR to Intron                |
| ENSMUSG00000073627 | + | Downstream switch | Exon to Exon                         |
| ENSMUSG00000073643 | - | Downstream switch | Intron to Distal-3UTR                |
| ENSMUSG00000074398 | - | Downstream switch | Intron to Exon                       |
| ENSMUSG00000074733 | - | Upstream switch   | Alternative-3UTR to Alternative-3UTR |
| ENSMUSG00000074749 | + | Upstream switch   | Distal-3UTR to Intron                |
| ENSMUSG00000074968 | - | Downstream switch | Intron to Distal-3UTR                |
| ENSMUSG00000075232 | - | Downstream switch | Exon to Intron                       |
| ENSMUSG00000078490 | + | Downstream switch | Intron to Exon                       |
| ENSMUSG00000078772 | + | Downstream switch | Intron to Intron                     |
| ENSMUSG00000078864 | + | Upstream switch   | Exon to Intron                       |
| ENSMUSG00000079283 | - | Upstream switch   | Distal-3UTR to Intron                |
| ENSMUSG00000079557 | - | Upstream switch   | Alternative-3UTR to Alternative-3UTR |
| ENSMUSG00000079658 | - | Upstream switch   | Distal-3UTR to Exon                  |
| ENSMUSG00000084799 | + | Downstream switch | Intron to Exon                       |

Table S2

|                    |   |                   |                            |
|--------------------|---|-------------------|----------------------------|
| ENSMUSG00000084808 | - | Upstream switch   | Intron to Intron           |
| ENSMUSG00000085022 | + | Downstream switch | Intron to Intron           |
| ENSMUSG00000085436 | + | Upstream switch   | Exon to Intron             |
| ENSMUSG00000085457 | + | Upstream switch   | Exon to Intron             |
| ENSMUSG00000085622 | - | Upstream switch   | Intron to Exon             |
| ENSMUSG00000085653 | - | Upstream switch   | Exon to Intron             |
| ENSMUSG00000085891 | + | Downstream switch | Intron to Exon             |
| ENSMUSG00000086429 | - | Upstream switch   | Intron to Exon             |
| ENSMUSG00000086714 | + | Upstream switch   | Intron to Intron           |
| ENSMUSG00000086728 | - | Downstream switch | Intron to Intron           |
| ENSMUSG00000086915 | - | Upstream switch   | Intron to Intron           |
| ENSMUSG00000087090 | - | Downstream switch | Exon to Exon               |
| ENSMUSG00000087366 | + | Downstream switch | Intron to Intron           |
| ENSMUSG00000087380 | + | Upstream switch   | Exon to Intron             |
| ENSMUSG00000087402 | + | Upstream switch   | Intron to Intron           |
| ENSMUSG00000087466 | + | Upstream switch   | Exon to Intron             |
| ENSMUSG00000087543 | + | Upstream switch   | Exon to Intron             |
| ENSMUSG00000089984 | - | Downstream switch | Intron to Distal-3UTR      |
| ENSMUSG00000090213 | - | Upstream switch   | Distal-3UTR to Intron      |
| ENSMUSG00000090626 | - | Downstream switch | Intron to Alternative-3UTR |
| ENSMUSG00000090942 | + | Upstream switch   | Distal-3UTR to Exon        |
| ENSMUSG00000091617 | - | Downstream switch | Intron to Distal-3UTR      |
| ENSMUSG00000092267 | + | Downstream switch | Exon to Exon               |
| ENSMUSG00000094724 | + | Upstream switch   | Intron to Alternative-3UTR |
| ENSMUSG00000095438 | - | Upstream switch   | Exon to Intron             |
| ENSMUSG00000096003 | - | Downstream switch | Intron to Distal-3UTR      |
| ENSMUSG00000096944 | + | Upstream switch   | Intron to Exon             |
| ENSMUSG00000097039 | + | Upstream switch   | Intron to Exon             |
| ENSMUSG00000097059 | + | Downstream switch | Exon to Intron             |
| ENSMUSG00000097125 | - | Downstream switch | Intron to Exon             |
| ENSMUSG00000097207 | + | Upstream switch   | Intron to Intron           |
| ENSMUSG00000097214 | + | Upstream switch   | Exon to Intron             |
| ENSMUSG00000097216 | - | Upstream switch   | Intron to Exon             |
| ENSMUSG00000097219 | - | Upstream switch   | Intron to Intron           |
| ENSMUSG00000097350 | + | Upstream switch   | Exon to Intron             |
| ENSMUSG00000097577 | - | Upstream switch   | Exon to Intron             |
| ENSMUSG00000099843 | - | Upstream switch   | Exon to Intron             |
| ENSMUSG00000101102 | - | Upstream switch   | Intron to Intron           |
| ENSMUSG00000104208 | - | Downstream switch | Intron to Exon             |

Table S2

| <b>pvalue (FDR)</b> | <b>logFC</b> | <b>DE</b> |
|---------------------|--------------|-----------|
| 0.010               | -2.08        | -1        |
| 0.001               | 3.89         | 1         |
| 0.003               | -0.65        | -1        |
| 0.010               | -0.20        | 0         |
| 0.006               | 0.21         | 0         |
| 0.001               | 0.04         | 0         |
| 0.018               | 2.12         | 1         |
| 0.002               | -1.44        | -1        |
| 0.002               | 0.17         | 0         |
| 0.034               | 2.19         | 1         |
| 0.001               | 0.11         | 0         |
| 0.006               | 0.59         | 0         |
| 0.002               | 3.24         | 1         |
| 0.027               | -0.22        | 0         |
| 0.005               | -0.28        | 0         |
| 0.005               | 0.01         | 0         |
| 0.047               | 0.21         | 0         |
| 0.016               | -0.84        | 0         |
| 0.000               | -1.09        | -1        |
| 0.002               | 1.01         | 1         |
| 0.000               | -0.09        | 0         |
| 0.007               | -0.40        | 0         |
| 0.005               | -0.58        | -1        |
| 0.003               | 0.25         | 0         |
| 0.015               | -0.11        | 0         |
| 0.011               | -0.02        | 0         |
| 0.006               | -0.32        | 0         |
| 0.025               | -0.16        | 0         |
| 0.000               | 0.03         | 0         |
| 0.001               | 1.05         | 1         |
| 0.006               | 3.10         | 1         |
| 0.007               | -0.55        | -1        |
| 0.015               | -0.33        | 0         |
| 0.012               | 0.01         | 0         |
| 0.012               | 0.92         | 1         |
| 0.027               | -0.86        | -1        |
| 0.005               | -1.13        | -1        |
| 0.000               | 0.01         | 0         |
| 0.006               | 0.33         | 0         |
| 0.000               | -1.37        | -1        |
| 0.003               | 0.62         | 1         |
| 0.044               | 0.24         | 0         |
| 0.002               | 0.22         | 0         |
| 0.015               | 2.03         | 1         |
| 0.029               | 1.05         | 1         |
| 0.050               | 0.09         | 0         |
| 0.016               | 0.38         | 0         |
| 0.012               | 1.17         | 1         |
| 0.010               | 0.40         | 0         |
| 0.028               | 0.79         | 1         |
| 0.001               | -1.03        | -1        |

Table S2

|       |       |    |
|-------|-------|----|
| 0.028 | 0.05  | 0  |
| 0.026 | 2.32  | 1  |
| 0.005 | -0.13 | 0  |
| 0.027 | 3.71  | 1  |
| 0.027 | 0.04  | 0  |
| 0.000 | 0.42  | 0  |
| 0.009 | -0.17 | 0  |
| 0.016 | -0.32 | 0  |
| 0.015 | 0.44  | 1  |
| 0.005 | 0.15  | 0  |
| 0.000 | -0.49 | -1 |
| 0.011 | 0.42  | 1  |
| 0.036 | -0.52 | -1 |
| 0.004 | 0.02  | 0  |
| 0.011 | 1.03  | 1  |
| 0.014 | -0.59 | -1 |
| 0.017 | -0.06 | 0  |
| 0.003 | -0.41 | -1 |
| 0.002 | 0.09  | 0  |
| 0.029 | 0.51  | 0  |
| 0.009 | 0.43  | 0  |
| 0.001 | -0.21 | 0  |
| 0.026 | 0.37  | 0  |
| 0.049 | 0.28  | 0  |
| 0.011 | -0.48 | -1 |
| 0.001 | -0.18 | 0  |
| 0.009 | -0.13 | 0  |
| 0.003 | 0.24  | 0  |
| 0.001 | -1.31 | -1 |
| 0.000 | 0.29  | 0  |
| 0.016 | -1.25 | -1 |
| 0.041 | 2.49  | 1  |
| 0.010 | 0.51  | 1  |
| 0.047 | -0.53 | 0  |
| 0.043 | -0.02 | 0  |
| 0.015 | -0.02 | 0  |
| 0.027 | -0.94 | -1 |
| 0.009 | -0.67 | -1 |
| 0.015 | -0.10 | 0  |
| 0.000 | 0.24  | 0  |
| 0.004 | 0.52  | 1  |
| 0.002 | 0.78  | 0  |
| 0.001 | 0.14  | 0  |
| 0.048 | 0.87  | 1  |
| 0.000 | -0.01 | 0  |
| 0.000 | -0.05 | 0  |
| 0.006 | 0.00  | 0  |
| 0.001 | 3.74  | 1  |
| 0.003 | -0.27 | 0  |
| 0.035 | 0.29  | 0  |
| 0.044 | -1.24 | -1 |
| 0.025 | -0.13 | 0  |
| 0.043 | 0.39  | 1  |

Table S2

|       |       |    |
|-------|-------|----|
| 0.007 | 0.10  | 0  |
| 0.006 | 0.60  | 0  |
| 0.000 | 0.82  | 1  |
| 0.011 | 1.02  | 1  |
| 0.008 | -1.05 | -1 |
| 0.020 | 0.22  | 0  |
| 0.018 | 2.52  | 1  |
| 0.009 | 0.26  | 0  |
| 0.001 | -1.00 | -1 |
| 0.000 | -0.45 | 0  |
| 0.008 | 0.03  | 0  |
| 0.047 | -0.03 | 0  |
| 0.029 | -0.34 | 0  |
| 0.009 | 0.30  | 0  |
| 0.021 | 1.27  | 1  |
| 0.012 | -0.70 | -1 |
| 0.024 | -0.03 | 0  |
| 0.006 | -0.02 | 0  |
| 0.001 | -0.43 | -1 |
| 0.011 | 0.07  | 0  |
| 0.005 | -2.56 | -1 |
| 0.006 | 1.68  | 1  |
| 0.014 | -0.21 | 0  |
| 0.000 | 0.70  | 1  |
| 0.004 | 1.27  | 1  |
| 0.000 | 1.20  | 1  |
| 0.015 | 0.17  | 0  |
| 0.002 | 1.17  | 1  |
| 0.000 | -0.68 | -1 |
| 0.011 | 0.40  | 0  |
| 0.035 | 1.96  | 1  |
| 0.036 | 0.17  | 0  |
| 0.002 | 2.32  | 1  |
| 0.022 | 1.94  | 1  |
| 0.046 | 0.15  | 0  |
| 0.000 | 4.26  | 1  |
| 0.021 | 0.04  | 0  |
| 0.018 | -0.56 | -1 |
| 0.020 | -0.43 | -1 |
| 0.043 | 0.40  | 0  |
| 0.035 | 3.00  | 1  |
| 0.022 | 0.04  | 0  |
| 0.001 | 0.14  | 0  |
| 0.001 | 2.82  | 1  |
| 0.022 | -0.10 | 0  |
| 0.016 | -2.03 | -1 |
| 0.022 | -0.13 | 0  |
| 0.008 | 0.50  | 1  |
| 0.001 | -1.17 | -1 |
| 0.015 | 0.22  | 0  |
| 0.009 | 1.02  | 1  |
| 0.011 | 1.39  | 1  |
| 0.000 | -0.30 | 0  |

Table S2

|       |       |    |
|-------|-------|----|
| 0.000 | 0.34  | 0  |
| 0.012 | 0.17  | 0  |
| 0.003 | 0.99  | 1  |
| 0.028 | -0.73 | -1 |
| 0.002 | 1.02  | 1  |
| 0.012 | 0.35  | 0  |
| 0.000 | 0.60  | 1  |
| 0.049 | 3.20  | 1  |
| 0.000 | 0.07  | 0  |
| 0.009 | 0.49  | 0  |
| 0.012 | 0.62  | 1  |
| 0.005 | 0.65  | 0  |
| 0.047 | -0.10 | 0  |
| 0.034 | 0.57  | 1  |
| 0.000 | 0.58  | 1  |
| 0.030 | -0.24 | 0  |
| 0.004 | 0.13  | 0  |
| 0.001 | 0.07  | 0  |
| 0.000 | -0.55 | -1 |
| 0.018 | 2.35  | 1  |
| 0.017 | 2.20  | 1  |
| 0.034 | 0.26  | 0  |
| 0.000 | -0.11 | 0  |
| 0.002 | 1.06  | 1  |
| 0.002 | 1.94  | 1  |
| 0.005 | 0.88  | 1  |
| 0.002 | 0.18  | 0  |
| 0.000 | 0.44  | 1  |
| 0.001 | -0.30 | 0  |
| 0.003 | -0.45 | -1 |
| 0.009 | -0.36 | 0  |
| 0.003 | -0.20 | 0  |
| 0.001 | 2.01  | 1  |
| 0.005 | -0.48 | -1 |
| 0.025 | 1.29  | 1  |
| 0.014 | -0.10 | 0  |
| 0.000 | 2.60  | 1  |
| 0.018 | -0.88 | -1 |
| 0.000 | -0.60 | -1 |
| 0.003 | 0.16  | 0  |
| 0.009 | -0.30 | 0  |
| 0.000 | 0.96  | 1  |
| 0.000 | -0.06 | 0  |
| 0.046 | 1.04  | 1  |
| 0.005 | 1.58  | 1  |
| 0.019 | 1.31  | 1  |
| 0.000 | -0.27 | 0  |
| 0.002 | 1.92  | 1  |
| 0.023 | 0.12  | 0  |
| 0.003 | 1.57  | 1  |
| 0.019 | 0.51  | 0  |
| 0.015 | 1.15  | 1  |
| 0.000 | -0.04 | 0  |

Table S2

|       |       |    |
|-------|-------|----|
| 0.000 | -0.48 | -1 |
| 0.000 | 2.73  | 1  |
| 0.001 | 0.03  | 0  |
| 0.009 | -0.29 | 0  |
| 0.013 | 2.28  | 1  |
| 0.003 | -0.23 | 0  |
| 0.000 | -0.71 | -1 |
| 0.000 | 0.36  | 1  |
| 0.005 | -1.27 | -1 |
| 0.026 | 0.57  | 1  |
| 0.000 | 0.39  | 0  |
| 0.008 | -0.99 | -1 |
| 0.002 | 0.40  | 0  |
| 0.000 | 0.51  | 1  |
| 0.009 | -0.61 | -1 |
| 0.004 | 0.66  | 1  |
| 0.003 | -0.47 | 0  |
| 0.014 | -0.77 | -1 |
| 0.009 | 0.69  | 1  |
| 0.003 | -0.41 | -1 |
| 0.000 | -0.37 | 0  |
| 0.005 | 0.12  | 0  |
| 0.004 | 0.04  | 0  |
| 0.043 | -0.90 | -1 |
| 0.007 | 0.21  | 0  |
| 0.015 | 0.30  | 0  |
| 0.000 | -0.04 | 0  |
| 0.000 | -0.50 | -1 |
| 0.047 | -0.58 | -1 |
| 0.006 | 0.36  | 0  |
| 0.014 | 0.16  | 0  |
| 0.000 | 1.80  | 1  |
| 0.002 | 1.51  | 1  |
| 0.000 | 0.03  | 0  |
| 0.006 | 0.26  | 0  |
| 0.001 | -2.15 | -1 |
| 0.033 | 0.42  | 0  |
| 0.002 | 1.63  | 1  |
| 0.046 | 0.79  | 1  |
| 0.010 | -0.33 | 0  |
| 0.006 | 0.41  | 0  |
| 0.025 | -0.54 | -1 |
| 0.001 | -0.04 | 0  |
| 0.002 | -0.59 | -1 |
| 0.000 | -2.52 | -1 |
| 0.042 | 0.00  | 0  |
| 0.019 | 0.67  | 1  |
| 0.001 | -0.91 | -1 |
| 0.018 | 1.30  | 1  |
| 0.005 | 1.40  | 1  |
| 0.001 | -0.43 | 0  |
| 0.018 | -0.10 | 0  |
| 0.011 | -0.05 | 0  |



Table S2

|       |       |    |
|-------|-------|----|
| 0.026 | 0.60  | 0  |
| 0.015 | -0.37 | 0  |
| 0.036 | 0.23  | 0  |
| 0.024 | 0.14  | 0  |
| 0.030 | 0.70  | 1  |
| 0.045 | 1.21  | 1  |
| 0.040 | -0.11 | 0  |
| 0.001 | 1.50  | 1  |
| 0.009 | 0.32  | 0  |
| 0.001 | 0.72  | 1  |
| 0.040 | -1.42 | -1 |
| 0.000 | 0.98  | 1  |
| 0.001 | 1.06  | 1  |
| 0.004 | 0.37  | 0  |
| 0.009 | 1.99  | 1  |
| 0.004 | -1.92 | -1 |
| 0.046 | 0.46  | 1  |
| 0.001 | -0.53 | -1 |
| 0.000 | -0.31 | 0  |
| 0.000 | -1.11 | -1 |
| 0.000 | 1.51  | 1  |
| 0.010 | -0.86 | -1 |
| 0.004 | 0.43  | 0  |
| 0.000 | 0.05  | 0  |
| 0.001 | 1.39  | 1  |
| 0.000 | -0.27 | 0  |
| 0.029 | -0.54 | -1 |
| 0.000 | 0.13  | 0  |
| 0.001 | -0.36 | 0  |
| 0.026 | -0.09 | 0  |
| 0.025 | -0.18 | 0  |
| 0.036 | -0.26 | 0  |
| 0.046 | 0.26  | 0  |
| 0.000 | 0.28  | 0  |
| 0.002 | -0.10 | 0  |
| 0.015 | -0.63 | -1 |
| 0.034 | -0.22 | 0  |
| 0.011 | -0.06 | 0  |
| 0.001 | 0.02  | 0  |
| 0.003 | 2.18  | 1  |
| 0.001 | -0.87 | -1 |
| 0.009 | -0.42 | 0  |
| 0.000 | 0.04  | 0  |
| 0.000 | 0.46  | 0  |
| 0.041 | 0.62  | 1  |
| 0.035 | 0.41  | 0  |
| 0.011 | 1.05  | 1  |
| 0.046 | 0.36  | 0  |
| 0.001 | 0.57  | 1  |
| 0.035 | -0.27 | 0  |
| 0.004 | -1.83 | -1 |
| 0.003 | 0.74  | 0  |
| 0.001 | 1.00  | 1  |

Table S2

|       |       |    |
|-------|-------|----|
| 0.000 | 0.34  | 0  |
| 0.001 | -0.64 | -1 |
| 0.001 | 0.39  | 0  |
| 0.000 | 0.77  | 1  |
| 0.034 | 2.17  | 1  |
| 0.015 | -0.63 | -1 |
| 0.008 | -0.06 | 0  |
| 0.001 | 0.13  | 0  |
| 0.028 | 1.05  | 1  |
| 0.046 | -0.56 | 0  |
| 0.000 | 0.98  | 1  |
| 0.025 | 0.40  | 0  |
| 0.010 | 2.93  | 1  |
| 0.011 | 1.64  | 1  |
| 0.009 | -1.05 | -1 |
| 0.001 | -0.07 | 0  |
| 0.000 | 0.53  | 1  |
| 0.028 | -0.13 | 0  |
| 0.009 | 0.38  | 1  |
| 0.036 | -0.46 | 0  |
| 0.005 | 0.05  | 0  |
| 0.014 | 3.35  | 1  |
| 0.008 | 0.65  | 1  |
| 0.000 | -0.57 | -1 |
| 0.018 | 0.84  | 1  |
| 0.001 | 0.95  | 1  |
| 0.023 | -0.09 | 0  |
| 0.000 | 1.23  | 1  |
| 0.010 | 0.76  | 1  |
| 0.000 | 0.36  | 0  |
| 0.000 | -1.49 | -1 |
| 0.026 | 0.09  | 0  |
| 0.002 | 0.87  | 1  |
| 0.009 | 2.40  | 1  |
| 0.029 | 0.39  | 0  |
| 0.019 | -0.07 | 0  |
| 0.000 | 0.03  | 0  |
| 0.027 | -0.21 | 0  |
| 0.004 | 0.22  | 0  |
| 0.044 | -0.01 | 0  |
| 0.012 | 0.10  | 0  |
| 0.029 | -0.58 | -1 |
| 0.011 | -0.44 | 0  |
| 0.009 | 0.30  | 0  |
| 0.005 | 0.10  | 0  |
| 0.011 | 0.22  | 0  |
| 0.008 | 1.25  | 1  |
| 0.012 | 0.65  | 1  |
| 0.028 | -0.75 | -1 |
| 0.007 | 2.40  | 1  |
| 0.025 | 0.18  | 0  |
| 0.020 | 0.75  | 1  |
| 0.010 | 0.07  | 0  |

Table S2

|       |       |    |
|-------|-------|----|
| 0.009 | -0.79 | -1 |
| 0.009 | 0.48  | 0  |
| 0.035 | -0.87 | -1 |
| 0.000 | 0.27  | 0  |
| 0.010 | -0.18 | 0  |
| 0.001 | 0.33  | 0  |
| 0.014 | 2.42  | 1  |
| 0.001 | 1.38  | 1  |
| 0.017 | 0.19  | 0  |
| 0.016 | 0.42  | 0  |
| 0.001 | 1.65  | 1  |
| 0.012 | -1.05 | -1 |
| 0.002 | 3.19  | 1  |
| 0.017 | -0.35 | 0  |
| 0.008 | 0.49  | 0  |
| 0.000 | 1.10  | 1  |
| 0.001 | 1.20  | 1  |
| 0.011 | 0.06  | 0  |
| 0.029 | 0.78  | 1  |
| 0.000 | 0.92  | 1  |
| 0.001 | 0.52  | 1  |
| 0.049 | 0.29  | 0  |
| 0.045 | 0.17  | 0  |
| 0.008 | 0.41  | 0  |
| 0.000 | 0.37  | 0  |
| 0.005 | -0.16 | 0  |
| 0.022 | 0.82  | 1  |
| 0.007 | 1.30  | 1  |
| 0.023 | -0.34 | 0  |
| 0.002 | 2.17  | 1  |
| 0.006 | 0.55  | 1  |
| 0.002 | -1.05 | -1 |
| 0.002 | 0.06  | 0  |
| 0.005 | 0.15  | 0  |
| 0.018 | 1.52  | 1  |
| 0.040 | -0.61 | -1 |
| 0.031 | 0.27  | 0  |
| 0.000 | -0.42 | 0  |
| 0.014 | -0.05 | 0  |
| 0.028 | 0.65  | 0  |
| 0.000 | 0.13  | 0  |
| 0.004 | 0.23  | 0  |
| 0.011 | 1.64  | 1  |
| 0.015 | 0.23  | 0  |
| 0.012 | -0.17 | 0  |
| 0.006 | 1.60  | 1  |
| 0.000 | 0.67  | 1  |
| 0.009 | -1.19 | -1 |
| 0.000 | -0.76 | -1 |
| 0.000 | -1.61 | -1 |
| 0.001 | 0.75  | 1  |
| 0.014 | 0.30  | 0  |
| 0.005 | -0.69 | -1 |

Table S2

|       |       |    |
|-------|-------|----|
| 0.001 | -0.02 | 0  |
| 0.007 | 0.12  | 0  |
| 0.028 | -0.07 | 0  |
| 0.001 | -0.08 | 0  |
| 0.001 | 0.92  | 1  |
| 0.002 | 1.70  | 1  |
| 0.000 | -1.17 | -1 |
| 0.018 | 0.88  | 1  |
| 0.003 | 1.71  | 1  |
| 0.004 | 0.63  | 1  |
| 0.000 | 0.14  | 0  |
| 0.006 | 0.86  | 0  |
| 0.004 | -0.08 | 0  |
| 0.014 | -0.83 | -1 |
| 0.006 | -0.20 | 0  |
| 0.047 | -1.59 | -1 |
| 0.023 | -0.85 | -1 |
| 0.000 | -1.11 | -1 |
| 0.000 | 0.30  | 0  |
| 0.011 | 1.08  | 1  |
| 0.007 | 2.17  | 1  |
| 0.047 | 0.30  | 0  |
| 0.035 | -0.26 | 0  |
| 0.036 | -0.54 | -1 |
| 0.019 | -0.06 | 0  |
| 0.001 | 0.25  | 0  |
| 0.004 | -1.33 | -1 |
| 0.029 | 0.62  | 1  |
| 0.039 | 0.19  | 0  |
| 0.029 | 1.44  | 1  |
| 0.027 | -0.24 | 0  |
| 0.022 | -0.41 | -1 |
| 0.027 | 0.24  | 0  |
| 0.003 | 0.14  | 0  |
| 0.000 | 0.12  | 0  |
| 0.000 | -0.25 | 0  |
| 0.001 | 1.30  | 0  |
| 0.017 | 0.27  | 0  |
| 0.004 | 0.14  | 0  |
| 0.024 | 3.18  | 1  |
| 0.006 | 0.95  | 1  |
| 0.028 | -0.39 | 0  |
| 0.007 | 0.31  | 0  |
| 0.028 | -0.33 | 0  |
| 0.000 | -0.18 | 0  |
| 0.025 | -0.93 | -1 |
| 0.005 | 0.15  | 0  |
| 0.009 | -2.13 | -1 |
| 0.035 | 1.09  | 1  |
| 0.000 | -0.18 | 0  |
| 0.004 | -0.40 | 0  |
| 0.006 | 0.78  | 1  |
| 0.003 | 0.08  | 0  |

Table S2

|       |       |    |
|-------|-------|----|
| 0.003 | -0.33 | 0  |
| 0.015 | -0.56 | -1 |
| 0.000 | -1.39 | -1 |
| 0.000 | 0.37  | 0  |
| 0.001 | 0.21  | 0  |
| 0.037 | 1.92  | 1  |
| 0.009 | -0.20 | 0  |
| 0.003 | 0.29  | 0  |
| 0.025 | 1.29  | 1  |
| 0.011 | 1.54  | 1  |
| 0.010 | 0.12  | 0  |
| 0.017 | 0.33  | 0  |
| 0.003 | 0.48  | 0  |
| 0.014 | 2.30  | 1  |
| 0.046 | 1.70  | 1  |
| 0.012 | -1.40 | -1 |
| 0.018 | -0.50 | 0  |
| 0.012 | 0.97  | 1  |
| 0.024 | 0.37  | 0  |
| 0.011 | 1.10  | 1  |
| 0.017 | -0.19 | 0  |
| 0.045 | 1.65  | 1  |
| 0.020 | 0.85  | 1  |
| 0.002 | -1.98 | -1 |
| 0.000 | 0.44  | 0  |
| 0.000 | 1.06  | 1  |
| 0.006 | 0.48  | 0  |
| 0.037 | -0.26 | 0  |
| 0.040 | -0.08 | 0  |
| 0.003 | 1.03  | 0  |
| 0.048 | 0.99  | 1  |
| 0.001 | 1.31  | 1  |
| 0.007 | -0.08 | 0  |
| 0.011 | -1.06 | -1 |
| 0.000 | 1.13  | 1  |
| 0.000 | 0.58  | 0  |
| 0.026 | 0.86  | 1  |
| 0.001 | 0.83  | 1  |
| 0.001 | 0.08  | 0  |
| 0.022 | 0.59  | 0  |
| 0.009 | 0.96  | 1  |
| 0.006 | -0.72 | -1 |
| 0.001 | 2.17  | 1  |
| 0.012 | -0.60 | -1 |
| 0.004 | 1.74  | 1  |
| 0.038 | -1.67 | -1 |
| 0.008 | 1.38  | 1  |
| 0.020 | 0.31  | 0  |
| 0.014 | -0.14 | 0  |
| 0.001 | 0.24  | 0  |
| 0.009 | -0.86 | -1 |
| 0.022 | -1.25 | -1 |
| 0.000 | 0.01  | 0  |

Table S2

|       |       |    |
|-------|-------|----|
| 0.008 | 1.06  | 1  |
| 0.016 | 1.87  | 1  |
| 0.017 | 0.22  | 0  |
| 0.001 | 1.78  | 1  |
| 0.025 | 2.13  | 1  |
| 0.011 | 1.25  | 1  |
| 0.047 | -0.73 | 0  |
| 0.000 | 2.30  | 1  |
| 0.024 | 2.62  | 1  |
| 0.000 | 1.85  | 1  |
| 0.002 | 0.05  | 0  |
| 0.000 | 0.85  | 1  |
| 0.028 | 0.76  | 0  |
| 0.023 | -0.50 | 0  |
| 0.023 | -0.26 | 0  |
| 0.003 | 0.98  | 1  |
| 0.001 | 1.10  | 1  |
| 0.027 | 0.25  | 0  |
| 0.015 | -0.15 | 0  |
| 0.018 | 0.38  | 0  |
| 0.000 | -0.41 | 0  |
| 0.040 | 1.96  | 1  |
| 0.026 | 0.44  | 0  |
| 0.007 | -0.03 | 0  |
| 0.001 | 1.39  | 1  |
| 0.008 | 1.08  | 1  |
| 0.020 | 0.17  | 0  |
| 0.015 | -0.30 | 0  |
| 0.003 | 2.28  | 1  |
| 0.012 | 0.80  | 0  |
| 0.001 | 0.70  | 1  |
| 0.034 | 0.22  | 0  |
| 0.005 | 2.01  | 1  |
| 0.008 | -0.84 | -1 |
| 0.014 | 0.05  | 0  |
| 0.028 | 0.96  | 1  |
| 0.003 | 2.31  | 1  |
| 0.004 | 4.39  | 1  |
| 0.001 | 0.98  | 1  |
